1

2 **Tightly constrained genome reduction and relaxation of purifying selection during**  
3 **secondary plastid endosymbiosis**

4 Kavitha Uthanumallian\*<sup>1</sup>, Cintia Iha<sup>1</sup>, Sonja I. Repetti<sup>1</sup>, Cheong Xin Chan<sup>2</sup>, Debashish  
5 Bhattacharya<sup>3</sup>, Sebastian Duchene<sup>4</sup>, Heroen Verbruggen<sup>1</sup>

6 *1. School of BioSciences, University of Melbourne, Melbourne, Australia*

7 *2. Australian Centre for Ecogenomics, School of Chemistry and Molecular Biosciences, The*  
8 *University of Queensland, Brisbane, Queensland 4072, Australia*

9 *3. Department of Biochemistry and Microbiology, Rutgers University, New Brunswick, New*  
10 *Jersey, 08901 USA*

11 *4. Dept. of Microbiology and Immunology, Peter Doherty Institute for Infection and Immunity,*  
12 *University of Melbourne, Melbourne, Australia*

13

14 \*Corresponding author: e-mail:kavitha.uthanumallian@student.unimelb.edu.au

15

16 Abstract (250 words max)

17

18 Endosymbiosis, the establishment of a former free-living prokaryotic or eukaryotic cell as an  
19 organelle inside a host cell, can dramatically alter the genomic architecture of the  
20 endosymbiont. Plastids, the light harvesting organelles of photosynthetic eukaryotes, are  
21 excellent models to study this phenomenon because plastid origin has occurred multiple  
22 times in evolution. Here, we investigate the genomic signature of molecular processes  
23 acting through secondary plastid endosymbiosis – the origination of a new plastid from a  
24 free-living eukaryotic alga. We used phylogenetic comparative methods to study gene loss  
25 and changes in selective regimes on plastid genomes, focusing on the green lineage that has  
26 given rise to three independent lineages with secondary plastids (euglenophytes,  
27 chlorarachniophytes, *Lepidodinium*). Our results show an overall increase in gene loss  
28 associated with secondary endosymbiosis, but this loss is tightly constrained by retention of  
29 genes essential for plastid function. The data show that secondary plastids have experienced  
30 temporary relaxation of purifying selection during secondary endosymbiosis. However, this

31 process is tightly constrained as well, with selection relaxed only relative to the background  
32 in primary plastids, but purifying selection remaining strong in absolute terms even during  
33 the endosymbiosis events. Selection intensity rebounds to pre-endosymbiosis levels  
34 following endosymbiosis events, demonstrating the changes in selection efficiency during  
35 different phases of secondary plastid origin. Independent endosymbiosis events in the  
36 euglenophytes, chlorarachniophytes, and *Lepidodinium* differ in their degree of relaxation of  
37 selection, highlighting the different evolutionary contexts of these events. This study reveals  
38 the selection-drift interplay during secondary endosymbiosis, and evolutionary parallels  
39 during the process of organelle origination.

40

#### 41 **Keywords**

42 Secondary endosymbiosis, plastids (photosynthetic organelle), selection efficiency variation,  
43 drift.

44

#### 45 Introduction

46 The endosymbiosis event leading to present-day chloroplasts is inferred to have taken place  
47 ~1.5 billion years ago through the incorporation of a cyanobacterium by a heterotrophic  
48 host (Yoon, et al. 2004; Price, et al. 2012; Nowack and Weber 2018). This endosymbiosis  
49 event is referred to as primary endosymbiosis, with the plastids of the organisms  
50 descending from this event termed primary plastids (Keeling 2010; Archibald 2015). Three  
51 photosynthetic lineages emerged from this ancestor: the Chlorophyta (green algae),  
52 Rhodophyta (red algae) and Glaucocystophyta. Subsequently, several red and green algae  
53 have engaged in secondary endosymbiosis events, giving rise to more complex plastids.  
54 Secondary endosymbiosis differs in having a eukaryotic alga (carrying a primary plastid) as  
55 the photosynthetic partner being established as an organelle, and this process has spread  
56 photosynthesis to many unrelated branches of the eukaryotic tree of life (Keeling 2010).  
57 Despite the relevance of plastid endosymbiosis for eukaryotic evolution and algal diversity,  
58 the understanding of molecular evolution during the origination of these plastids is limited.  
59 Endosymbionts often experience lowered levels of natural selection (Latorre and Manzano-  
60 Marín 2017; Wernegreen 2017), with the elevation of levels of stochastic genetic drift

61 leading to an accumulation of slightly deleterious mutations, resulting in genome reduction  
62 and making them more susceptible to degradation (Moran 1996; Pettersson and Berg 2007;  
63 Moran, et al. 2008; Bennett and Moran 2015). Plastids have retained a highly reduced  
64 genome (ca. 100-200kb) characterised by accelerated rates of evolution and AT-biased  
65 nucleotide composition compared to free-living cyanobacteria (Green 2011; Bennett and  
66 Moran 2015). As is the case in many endosymbionts, plastid genomes have lost the majority  
67 of cyanobacterial genes, some having been transferred to the nucleus. Some of the gene  
68 losses are compensated by nucleus-encoded plastid-targeted genes that enable integration  
69 of plastids into the host cell biology. Plastid genomes have a highly conserved set of key  
70 genes encoding for core components involved in photosystem, ATP synthesis and protein  
71 translation (Allen 1993, 2017) that are under strong purifying selection (Smith 2015;  
72 Grisdale, et al. 2019). Several hypotheses suggest that the retention of genes in the plastid  
73 genome enhances the ability of organelles to efficiently respond to fluctuating conditions  
74 (Allen 1993, 2017; Johnston 2019). Strong purifying selection on the retained plastid  
75 genomes distinguishes them from most other endosymbiont genomes in early stages of  
76 endosymbiosis. While parallels can be expected between the evolutionary forces acting  
77 during establishment of plastid endosymbiosis (e.g. (Reyes-Prieto, et al. 2010; Lhee, et al.  
78 2019) and other obligate endosymbiosis events based on the similarities in their overall  
79 genomic features, there has been very little work on characterising patterns of selection and  
80 drift in the origination of plastid organelles.

81 Secondary endosymbiosis differs fundamentally from primary because at the start of this  
82 process, the genomes of the primary plastid have already transitioned to a reduced state  
83 (Green 2011), with secondary green plastids having roughly similar gene content to primary  
84 green plastids (Suzuki, et al. 2016; Karnkowska, et al. 2018). Inouye and Okamoto (2005)  
85 postulate that secondary endosymbiosis of plastids involves several stages, beginning with  
86 permanent retention of the engulfed primary alga, followed by reduction of the  
87 endosymbiont genomes (primarily the nucleus) and ultimately fixed as an organelle through  
88 nuclear encoded plastid targeted genes. Recent studies have emphasized the possible role  
89 of the secondary host nucleus in facilitating the integration of the incoming green plastids in  
90 lineages that have hosted other plastids before (Ponce-Toledo, et al. 2018; Ponce-Toledo, et  
91 al. 2019). All these previous studies related to secondary endosymbiosis are focused on the

92 endosymbiont's nuclear genome reduction, but the molecular evolution of plastid genomes  
93 through the various stages of secondary endosymbiosis remains largely unexplored.

94 This study aims to characterise the molecular evolutionary processes acting on the origin of  
95 secondary plastids, using secondary plastids of green algal ancestry as a model system.

96 These secondary plastids are found in three lineages, the chlorarachniophytes (a group of  
97 Rhizaria), the euglenophytes (a group of excavates) and the dinoflagellate genus

98 *Lepidodinium* (Jackson *et al.* 2018). The existence of these three evolutionary events,

99 distinctly independent from each other and with clearly identifiable host and plastid donor

100 origins, makes green-type secondary plastid an excellent case study to investigate features

101 common to secondary endosymbiosis events and those unique to individual events. Here,

102 we use phylogenetic methods to examine the variation in selection on genes before, during,

103 and after endosymbiosis, and to compare how this selection varies across genes and

104 endosymbiosis events. We also quantify patterns and rates of gene loss across these events

105 of secondary endosymbiosis. Our results are interpreted in the light of evolutionary

106 processes that can contribute to variation in selection during secondary endosymbiosis.

## 107 **Results and Discussion**

### 108 *Plastid genome features*

109 Most plastid genomes, including those of secondary plastids, had small genomes (median  
110 153kb), low GC proportion (0.34) and encoded an average of 80 annotated protein-coding

111 genes. Plastid genomes of chlorarachniophytes (70kb genome, 60 CDS) and *Lepidodinium*

112 (66kb, 62 CDS) are smaller with fewer CDS than those of euglenophytes plastid genomes

113 (90kb, 64 CDS) (Table S1). Codon usage bias estimated using synonymous codon usage

114 order showed that all green plastids studied had similar codon usage bias that appeared

115 proportional to nucleotide composition (Figure S1). Among the secondary plastid lineages,

116 chlorarachniophyte plastids had slightly lower GC content and higher codon usage bias than

117 euglenophytes and *Lepidodinium*. However, codon usage bias for secondary plastids was

118 within the range of that observed for primary plastids.

### 119 *Tightly constrained genome reduction*

120 By grouping protein-coding genes into orthogroups and estimating gene loss with Dollo  
121 parsimony, it became apparent that plastid genomes experience an elevated level of  
122 genome reduction during secondary endosymbiosis events, but that they retain all key  
123 plastid genes encoding for core subunits related to photosynthesis, ATP and protein  
124 synthesis (Figure 1 and Figure 2). Reductive genome evolution highlights the similarities in  
125 molecular evolution between secondary plastid endosymbiosis and many examples of  
126 bacterial endosymbiosis in insects (McCutcheon and Moran 2012). Gene loss is particularly  
127 severe during primary endosymbiosis, with cyanobacteria-sized genomes (ca. 1,800-12,000  
128 genes) reducing to the ca. 80-230 genes found in primary plastids (Gabr, et al. 2020). Gene  
129 loss from plastids during secondary endosymbiosis was small in comparison, with our  
130 estimates indicating that chlorarachniophytes lost 30 genes during secondary  
131 endosymbiosis followed by euglenophytes with 24 and *Lepidodinium* with 22 gene losses  
132 (Figure 1). Even though the endosymbiotic branches are among the top five branches losing  
133 the most genes, the difference compared to the background is not statistically significant  
134 (ANOVA and Tukey HSD tests), possibly due to the small sample size (n=3) of endosymbiotic  
135 branches available for analysis.

136 When viewed as the rate of gene loss per million years of evolution, the endosymbiosis  
137 branches had somewhat higher rates on average (Figure 2) but ranked lists showed that  
138 chlorarachniophytes and *Lepidodinium* were not among the branches losing genes fastest.  
139 So, despite most gene losses occurring on the endosymbiotic branches, the rates of loss per  
140 million years for these branches are not particularly high, suggesting that gene loss is a  
141 punctuated process occurring early in endosymbiosis (Moran and Mira 2001; Oakeson, et al.  
142 2014). When correcting for the branch lengths of endosymbiotic branches, this punctuated  
143 effect is diluted to the point of not differing from background rates. Interestingly, the three  
144 independent endosymbiosis events showed similar numbers of gene losses (in the 22-30  
145 range), adding to a list of similarities between secondary endosymbiosis events that also  
146 includes the convergent evolution of nucleomorph architecture seen in chlorarachniophytes  
147 and cryptophytes (Sarai, et al. 2020; Sibbald and Archibald 2020).

148 Our gene loss analysis showed that 17 genes were lost more than 10 times across the  
149 phylogeny, including *rp32* (ribosomal protein, 30 times), *psb30* (photosystem II, 22), *tifS*  
150 (tRNA Ile-Lysidine synthetase, 18), *petL* (Cytochrome b6-f complex, 16) and *ycf47* (14). Only

151 *accD* (lipid acid synthesis), *ccsA* (mediates heme attachment to c-type cytochromes) and  
152 *ftsH* (cell division) were lost in all three endosymbiotic events. Some genes lost during one  
153 endosymbiotic event are also absent from other secondary plastids, but were lost before  
154 the endosymbiotic event. For instance, *ndh* [A:I,K](NAD(P)H oxidoreductase) was lost during  
155 euglenophyte endosymbiosis but it was also lost from the green algal lineages that gave rise  
156 to the chlorarachniophytes and *Lepidodinium*. Most of the genes lost during secondary  
157 endosymbiosis are likely to be compensated by nuclear homologs or through an alternative  
158 mechanism. For instance, the light-independent chlorophyll synthesis genes *chlB*, *chlL* and  
159 *chlN* that were lost during chlorarachniophyte and euglenophyte endosymbiosis and in  
160 many other primary plastids, including the ancestors of *Lepidodinium*, can be compensated  
161 by the light-dependent chlorophyll production pathway (Hunsperger, et al. 2015). The *chlB*,  
162 *chlL* and *chlN* genes have also been lost from some secondary plastids of cryptophyte algae  
163 (Fong and Archibald 2008).

164 Homologs of *rpl12*, *rpl32*, *rps9* (small ribosomal proteins), *infA* (translational initiation  
165 factor) and *ftsH* were found in the nuclear genome of the chlorarachniophyte *Bigeloviella*  
166 *natans* (Curtis, et al. 2012), suggesting they may have been transferred from the plastid  
167 rather than lost entirely. Similarly, homologs of *petA*, *petN*, *ycf3*, *clpP* (Clp protease  
168 proteolytic subunit) and *ftsH* were recovered in the transcriptomes of the euglenophytes  
169 *Euglena gracilis* and *Eutreptiella* (Hrdá, et al. 2012). Aside from the genes mentioned above,  
170 all other genes lost during secondary endosymbiosis including genes with a function in  
171 photosynthesis (like *psb30*, *psbM*, *psaI*) were not detected in the nuclear genomes of *B.*  
172 *natans* and *E. gracilis* and may represent genuine gene losses, but some caution is  
173 warranted as most of these proteins are small and may be missed in genome-wide blast  
174 searches.

175 Several of the genes predicted to be lost during secondary endosymbiosis (*accD*, *infA*, *ndh*,  
176 *ycf1*, *ycf3* and *ycf4*) were lost from plastid genomes in other lineages too, and compensatory  
177 nuclear-encoded genes have been identified (Boudreau, et al. 1997; Millen, et al. 2001;  
178 Martín and Sabater 2010; Huerlimann and Heimann 2012).

179 Losses of genes whose functions can be compensated are likely to have little impact on  
180 plastid function. Loss of similar genes in parallel in different parts of the tree suggests they  
181 may experience reduced selective constraints compared to key photosynthesis genes, and in

182 periods with increased drift, such genes may be more likely to be lost than genes under  
183 stronger selection. Recent work shows that genes encoding central subunits of the electron  
184 transport chain are more likely to be retained in the organelle (Johnston and Williams 2016). In  
185 line with this, we see that across the green algal phylogeny, 48 genes including the core  
186 components of photosynthesis and protein synthesis remained highly conserved (never lost  
187 or lost once).

188 The role of selection in retaining genes has also been demonstrated in the chromatophore  
189 genomes of *Paulinella*, a model species for the study of primary endosymbiosis (Reyes-  
190 Prieto, et al. 2010; Valadez-Cano, et al. 2017; Lhee, et al. 2019). Overall, our results suggest  
191 that genome reduction appears to be elevated during secondary endosymbiosis but is a  
192 tightly constrained process with strong selection to retain genes with key functions. Of  
193 course, the lineages with secondary endosymbionts that we study here are all  
194 photosynthetic, implying that by the design of our study, we introduced a bias towards  
195 endosymbiosis events that would have maintained all genes with an essential function in  
196 photosynthesis. It is perfectly conceivable that other outcomes are possible in  
197 endosymbiosis events that do involve loss of photosynthetic function, but we are not aware  
198 of any instances where a cyanobacteria or eukaryotic alga has been retained as an  
199 endosymbiont for functions other than photosynthesis, besides secondarily non-  
200 photosynthetic groups such as apicomplexans.

### 201 *Selection dynamics through endosymbiosis*

202 For our analysis of selection dynamics through endosymbiosis, the phylogeny was divided  
203 into three sets of branches representing primary plastids (P), secondary plastids (S) and  
204 endosymbiosis branches (E). Selection intensity during secondary endosymbiosis was  
205 quantified using a Hyphy RELAX model that contrasts the selection on the endosymbiosis  
206 branches relative to all other branches. The relative selection intensity parameter (k-value)  
207 of the fitted model showed that the distribution of k-values across genes is well below 1  
208 (median 0.43), a clear signature of relaxation of selection in the endosymbiotic branches (E)  
209 compared to all other branches (P+S) (Figure 3, and see Tables 1, S2). Of the 34 genes in the  
210 analysis, 26 showed statistically supported relaxation. Two outlier genes (*psbD* and *psbE*)  
211 showed slight intensification of selection ( $k > 1$ ) for this model, but without significant  
212 statistical support. The same model (denoted E × P+S) applied to a concatenated alignment



213 of all plastid genes (Table S3) returned results in line with the findings for individual genes,  
214 with relative selection intensity parameter ( $k$ ) value of 0.55. The  $E \times P+S$  model is a  
215 significantly better fit to the concatenated sequences than the null model ( $p < 0.0001$  and  
216 likelihood ratio = 557.65), implying a significant decrease in evolutionary selection  
217 (relaxation) during endosymbiosis.

218 While the signature of relaxation is clear, this does not imply that molecular evolution is  
219 neutral in endosymbiotic branches. The model categorised 82.12% of sites as being under  
220 purifying selection, with  $\omega$  (ratio of non-synonymous( $dN$ ) to synonymous( $dS$ ) substitutions)  
221 value of 0.06 in the endosymbiotic branches indicating that most sites remain under  
222 purifying selection even during endosymbiosis events. BUSTEC analyses provided additional  
223 statistical support for purifying selection along endosymbiosis branches, with all genes  
224 having lower AIC scores for the unconstrained model with purifying selection than for the  
225 model constrained to exclude purifying selection (Table S4).

226 Selection analysis based on the  $E \times P+S$  model and the BUSTEC results helps to characterise  
227 the molecular evolutionary process during secondary plastid endosymbiosis. Studies of  
228 insect endosymbionts suggest that relaxation of purifying selection during endosymbiosis  
229 establishment in obligate endosymbionts of insects can be due to two processes: a  
230 population bottleneck and decrease in functional constraints on proteins (Moran 1996;  
231 Wernegreen 2004, 2015). In the case of secondary plastid endosymbiosis, it seems unlikely  
232 to have much relaxation on functional constraints, in line with the observations of purifying  
233 selection and tight constraints on gene loss. Also, the relaxation is observed on nearly all  
234 retained genes, further shifting the balance of evidence towards population size effects on  
235 plastid genomes evolution during endosymbiosis. The near-neutral theory predicts that in  
236 small populations, the fate of near-neutral mutations depends on the balance between  
237 selection and the stochastic effect of drift (Ohta 1972, 1992). During bottlenecks, one can  
238 expect strongly deleterious mutations to continue being eliminated, while slightly  
239 deleterious mutations will have higher chances of being fixed in the population by stochastic  
240 drift than being eliminated by selection (Woolfit and Bromham 2003). In the chloroplast  
241 genes studied here, one would expect this process to result in more non-synonymous  
242 substitutions in the endosymbiotic branches, in line with the reduced selection efficiency we  
243 observe.



244 Relative selection analysis using a different model comparing secondary plastids to primary  
245 plastids (denoted  $S \times P(E)$ ) suggests that relaxation of selection during endosymbiosis is  
246 temporary, indicated by distribution of  $k$ -values that encompasses 1 (median 0.87) and  
247 similar numbers of genes that were relaxed (13), intensified (9) or inconclusive (9) in  
248 secondary branches. The analysis on concatenated sequences showed similar results  
249 (median  $k = 0.96$ ) and was not preferred over the null model, providing a clear indication  
250 that following the relaxation during endosymbiosis, the purifying selection regime on plastid  
251 genes returns to values similar to those before endosymbiosis.

252 Comparative studies of the genomes of endosymbionts at different stages of integration  
253 have shown that genome stability increases with the age of the endosymbiont and  
254 suggested this may be due to selection (Allen, et al. 2009; Martínez-Cano, et al. 2015). Our  
255 findings agree with these observations, and our model system has the added advantage of  
256 the endosymbiont becoming a stable organelle, fully integrated and co-diversifying with the  
257 host following endosymbiosis, which was not the case in the previously studied  
258 endosymbiont models. This allowed us to disentangle the molecular dynamics along the  
259 endosymbiosis branch from that of a stable integrated secondary plastid, showing that the  
260 purifying selection regime rebounds to near pre-endosymbiosis levels once the organelle is  
261 established.

262 Our results suggest a general model for the molecular dynamics of secondary plastid  
263 endosymbiosis (Figure 4). It is likely that a very small fraction of the actual population of the  
264 engulfed primary alga is involved in secondary endosymbiosis, creating a drastic population  
265 size bottleneck. This decrease in effective population size would then allow higher levels of  
266 drift to fix slightly deleterious mutations, explaining the long branches in the phylogeny of  
267 green plastids where secondary endosymbiosis events take place (Jackson et al. 2018).

268 Maintenance of the plastid genome during secondary endosymbiosis depends largely on  
269 nuclear-encoded DNA replication and repair proteins (Smith and Keeling 2015). During  
270 secondary endosymbiosis, nuclear-encoded proteins are often transferred from the algal  
271 nucleus to the new host nucleus, with the product directed to the new plastid. This might  
272 contribute to a period of reduced fidelity of plastid DNA replication during secondary  
273 endosymbiosis, which might in some cases lead to failure of the secondary plastid  
274 endosymbiosis. As the endosymbiont-host relationship ages, the drift acting on plastid

275 genomes could eventually decrease, with higher effective population size and level of  
276 integration of plastid and host nucleus. This is reflected in the increased levels of selection  
277 on secondary plastids following endosymbiosis, emphasising the important interplay  
278 between drift and selection during secondary endosymbiosis and their resulting impact on  
279 secondary plastid genomes.

### 280 *Three independent events*

281 Our analyses comparing selection regimes of the three endosymbiosis events to the  
282 background individually showed distinctive scenarios. *Lepidodinium* showed the strongest  
283 relaxation ( $k = 0.3$ ) followed by chlorarachniophytes ( $k = 0.45$ ), indicating evidence of  
284 strongly relaxed selection during these two endosymbiotic events. However, euglenophytes  
285 showed a  $k$ -value of 0.86, indicating a much lower level of relaxation during this  
286 endosymbiosis event.

287 Tightly constrained genome reduction along with evident purifying selection across all three  
288 green algal secondary endosymbioses emphasises the evolutionary parallels among these  
289 independent events, but also clearly distinguishes the origin of secondary green plastids  
290 from other recently established obligate endosymbionts. Differences in degrees of  
291 relaxation and gene losses during these three secondary endosymbiosis events highlight the  
292 different evolutionary pressures associated with them. Nutritional requirements and level of  
293 mixotrophy can account for different evolutionary pressures during plastid endosymbiosis.

294 Because our analyses support increased drift, the differing relaxation intensity between the  
295 events implies that there may be differences in the extent of population bottlenecks  
296 underlying these events. Among the three events, euglenophytes are noticeable as they had  
297 the least relaxation of selection. The endosymbiosis branch leading to the euglenophytes in  
298 the phylogeny is shorter than the other two endosymbiosis branches, suggesting that plastid  
299 genes have evolved through this secondary endosymbiosis with fewer substitutions (Jackson  
300 et al. 2018, Figure 1). This might be due to a less intense population bottleneck with more  
301 efficient integration of the plastid during euglenophyte endosymbiosis compared with the  
302 other two green secondary endosymbioses. Absence of homologs of plastid origin for  
303 protein import components and plastid division in euglenophytes has led to speculation that  
304 integration of their plastids involved a novel/simplified process including proteins of host

305 origin (Zahonova, et al. 2018; Novák Vanclová, et al. 2020), which could have facilitated  
306 more efficient integration of their plastid genomes, allowing faster recovery from  
307 bottleneck. This may have enabled euglenophyte plastids to integrate with less relaxation of  
308 selection.

309

## 310 **Material and methods**

### 311 *Dataset*

312 We compiled a dataset of 122 green plastid genomes spanning the primary plastids of green  
313 algae (Chlorophyta, 104 genomes) and the secondary plastids of Euglenophyta (12  
314 genomes), Chlorarachniophyta (5 genomes) and the dinoflagellate genus *Lepidodinium* (1  
315 genome). A reference phylogeny (Figure 1) was obtained from a previous study (Jackson, et  
316 al. 2018). Our dataset includes close extant relatives of ancestral green algae that were  
317 involved in the secondary endosymbiosis events, making this green plastid dataset suited to  
318 examining the molecular evolutionary dynamics associated with secondary endosymbiosis,  
319 and investigating differences and similarities among the three independent cases of  
320 secondary green plastid origination. Basic features of the plastid genomes such as number  
321 of coding sequences (CDS) and genome size were recorded and GC content of CDS and  
322 codon usage bias were calculated using the CodonO (Wan, et al. 2007) function from the  
323 cubfits v.0.1-3 (Chen 2014) package in R v.3.5.1 (R core Team, 2018).

### 324 *Analysis of gene loss*

325 To investigate evolutionary patterns of gene loss, protein-coding genes were grouped into  
326 orthogroups using OrthoFinder version 1.4.0 with standard parameters (Emms and Kelly  
327 2015). Of the 203 orthogroups (OGs) that were present across multiple species, 116 OGs  
328 corresponded to named genes with known function conserved across most plastids, while  
329 the remaining OGs (mostly hypothetical genes of unknown function) were not examined  
330 further. A presence/absence matrix of the 116 orthogroups corresponding to named genes  
331 was constructed. Using this matrix and the reference phylogeny from Jackson et al. (2018),  
332 gene gain and loss along the phylogeny was estimated using PHYLIP version 3.695  
333 (Felsenstein 2005), with the Dollo parsimony method and printing the states at all nodes of

334 the tree. Gene loss and gain along each branch was extracted from the PHYLIP output using  
335 OrthoMCL Tools (DOI 10.5281/zenodo.51349). The rate of gene loss and gain per million  
336 years was calculated for each branch using the evolutionary time from the chronogram  
337 presented by Jackson et al (2018). The estimated numbers of genes lost (and rates of gene  
338 loss) were ranked from largest to smallest to see if endosymbiotic branches had greater  
339 values compared to the background, and evaluated formally using ANOVA and Tukey HSD  
340 tests in the stats v3.6.2 package of R core Team (2013). To investigate if the genes lost  
341 during the secondary endosymbiosis may have been transferred to host nuclear genomes,  
342 we performed local tBLASTn searches using orthologous genes as query against the  
343 published nuclear genomes of *Bigelowiella natans* (Curtis, 2012) and *Euglena gracilis*  
344 ([https://www.ncbi.nlm.nih.gov/assembly/GCA\\_900893395.1](https://www.ncbi.nlm.nih.gov/assembly/GCA_900893395.1)) (e-value cut-off = 1e-05).

#### 345 *Selection intensity analysis*

346 To study the variation in selection intensity in the protein-coding genes of secondary and  
347 primary green plastids, we used the hypothesis-testing framework RELAX (Wertheim, et al.  
348 2014) from the HyPhy software package version 2.3.14 (Kosakovsky Pond, et al. 2005;  
349 Delport, et al. 2010). This framework requires a predefined tree with subsets of test and  
350 reference branches specified. The subset of branches that are not set as test or reference  
351 remain unclassified. RELAX applies a branch-site model to estimate the strength of natural  
352 selection based on the ratio of non-synonymous to synonymous substitutions ( $\omega$ )  
353 for three different  $\omega$  categories ( $\omega_1 < \omega_2 \leq 1 < \omega_3$ ) in the test and reference subsets.  $\omega < 1$   
354 represents sites under purifying selection,  $\omega > 1$  represents sites under positive selection  
355 and  $\omega = 1$  represents sites under neutral evolution. The relative selection intensity  
356 parameter ( $k$ ) reflects intensification or relaxation of selection based on the relative  
357 proximity of  $\omega$  values to 1 (neutral evolution). If  $\omega$  values of test branches are closer to 1  
358 than reference branches, then selection is relaxed ( $k < 1$ ) and in the opposite scenario,  
359 selection has intensified ( $k > 1$ ). The null model assumes identical  $\omega$  values ( $k = 1$ ) between  
360 test and reference branches. The alternative model fits different sets of  $\omega$  values for test  
361 and reference, and thus  $k$  differs from 1, allowing a formal test of relaxed ( $k < 1$ ) or  
362 intensified ( $k > 1$ ) selection. The likelihood ratio test (LR) performed with  $p$ -value  $< 0.05$  by  
363 comparing the null and alternate model quantifies statistical confidence for the obtained  $k$   
364 value.

### 365 *Models for Selection Analysis*

366 We used the HyPhy-RELAX method to study molecular evolution through the process of  
367 endosymbiosis by designing different evolutionary models that allowed us to study aspects  
368 of selection intensity before, during and after the endosymbiosis process. For the selection  
369 analyses we included only genes that were present in all of the lineages with secondary  
370 plastids (34 orthologous genes). The phylogenetic tree of algal green plastid genomes from  
371 Jackson et al. (2018) was used as the predefined tree on which test and reference branches  
372 were marked. In the phylogeny (Figure 1), branches leading to and connecting the species  
373 containing primary plastids (i.e. the green algae) were indicated as primary branches (P),  
374 and denote the state before secondary endosymbiosis. Secondary branches (S) are the  
375 branches leading to and connecting the species containing secondary plastids, and denote  
376 the state after secondary endosymbiosis. The endosymbiotic branches (E) indicate branches  
377 connecting the backbone of green algal lineages to the lineages with secondary green  
378 plastids, in other words the branches along which secondary endosymbiosis took place  
379 (orange-coloured branches in Fig. 1). The *Lepidodinium* lineage includes only one plastid  
380 genome so we consider this branch as the endosymbiotic branch for this case.

381 Our first model, denoted "E × P+S", has endosymbiotic (E) branches as the test set and all  
382 non-endosymbiotic branches (P+S) as the reference set. This model allows us to compare  
383 the selection intensity during endosymbiosis relative to before and after endosymbiosis. Our  
384 second model, denoted "S × P(E)", allowed us to evaluate differences in selection intensity  
385 between secondary (S) and primary (P) plastids, excluding the endosymbiont branches (E).

386 To study differences between individual endosymbiosis events, we fitted E × P+S models,  
387 but specifying only a single endosymbiotic branch as test (excluding all other endosymbiotic  
388 branches) and all non-endosymbiotic branches (P+S) as the reference set.

### 389 *Purifying selection analysis*

390 Because functional plastid genes are expected to experience purifying selection, we also  
391 carried out an analysis to identify and quantify levels of purifying selection. The BUSTEC  
392 method implemented in HyPhy tests for alignment-wide evidence of conservation by fitting  
393 a random effects branch-site model to the entire phylogeny or a subset of tree branches  
394 (Murrell, et al. 2015). The null model constrains  $\omega$  values to greater than or equal to 1,

395 excluding the possibility of purifying selection. The unconstrained model allowing  $\omega$  values  
396 greater than and less than 1 serves as the alternate model. With endosymbiotic branches as  
397 the test branches, we used BUSTEC to fit the alternative unconstrained and null constrained  
398 models to these branches to quantify evidence for purifying selection during endosymbiosis.

#### 399 **Funding:**

400 This work was supported by Australian Research Council Discovery Project to HV, CXC & DB  
401 (DP150100705).

#### 402 **Acknowledgements:**

403 We thank the people who worked on chloroplast genomics and delivered the data needed  
404 for this study. We acknowledge the Traditional Owners of the land on which we work, and  
405 pay our respects to their Elders, past, present and emerging. We are thankful to Sergei L.  
406 Kosakovsky Pond for his recommendations on BUSTEC.

#### 407 **Conflicts of Interest:**

408 The authors declare no conflicts of interests.

#### 409 **References**

- 410 Allen JF. 2017. The CoRR hypothesis for genes in organelles. *J Theor Biol* 434:50-57.
- 411 Allen JF. 1993. Redox control of gene expression and the function of chloroplast genomes - an  
412 hypothesis. *Photosynth Res* 36:95-102.
- 413 Allen JM, Light JE, Perotti MA, Braig HR, Reed DL. 2009. Mutational Meltdown in Primary  
414 Endosymbionts: Selection Limits Muller's Ratchet. *PLoS ONE* 4:4969-4969.
- 415 Archibald JM. 2015. Review The Puzzle of Plastid Evolution. *Curr Biol* 19:R81-R88.
- 416 Bennett GM, Moran NA. 2015. Heritable symbiosis: The advantages and perils of an evolutionary  
417 rabbit hole. *Proc Natl Acad Sci USA* 112:10169-10176.
- 418 Boudreau E, Takahashi Y, Lemieux C, Turmel M, Rochaix JD. 1997. The chloroplast ycf3 and ycf4 open  
419 reading frames of *Chlamydomonas reinhardtii* are required for the accumulation of the  
420 photosystem I complex. *EMBO J* 16:6095-6104.
- 421 Chen WC, Zaretzki, R., Howell, W., Landerer, C., Schmidt, D., and Gilchrist, M.A. 2014. cubfits: Codon  
422 Usage Bias Fits. In. cubfits: Codon Usage Bias Fits.
- 423 Curtis BA, Tanifuji G, Burki F, Gruber A, Irimia M, Maruyama S, Arias MC, Ball SG, Gile GH, Hirakawa  
424 Y, et al. 2012. Algal genomes reveal evolutionary mosaicism and the fate of nucleomorphs.  
425 *Nature* 492:59-63.

- 426 Delpont W, Poon AFY, Frost SDW, Kosakovsky Pond SL. 2010. Sequence analysis Datamonkey 2010: a  
427 suite of phylogenetic analysis tools for evolutionary biology. *Bioinformatics* 26:2455-2457.
- 428 Emms DM, Kelly S. 2015. OrthoFinder: solving fundamental biases in whole genome comparisons  
429 dramatically improves orthogroup inference accuracy. *Genome Biol* 16:1-14.
- 430 Felsenstein J. 2005. PHYLIP (Phylogeny Inference Package). Version 3.6: Department of Genome  
431 Sciences, University of Washington, Seattle.
- 432 Fong A, Archibald JM. 2008. Evolutionary Dynamics of Light-Independent Protochlorophyllide  
433 Oxidoreductase Genes in the Secondary Plastids of Cryptophyte Algae. *Eukaryot cell* 7:550-553.
- 434 Gabr A, Grossman AR, Bhattacharya D. 2020. Paulinella, a model for understanding plastid primary  
435 endosymbiosis. *Journal of Phycology* 56:837-843.
- 436 Green BR. 2011. Chloroplast genomes of photosynthetic eukaryotes. *The Plant Journal* 66:34-44.
- 437 Grisdale CJ, Smith DR, Archibald JM. 2019. Relative mutation rates in nucleomorph-bearing algae.  
438 *Genome Biol Evol* 11:1045-1053.
- 439 Hrdá S, Fousek J, Szabová J, Hampl VV, Vlček C. 2012. The Plastid Genome of Eutreptiella Provides a  
440 Window into the Process of Secondary Endosymbiosis of Plastid in Euglenids. *PLoS ONE*  
441 7:33746-33746.
- 442 Huerlimann R, Heimann K. 2012. Comprehensive guide to acetyl-carboxylases in algae Cell biology  
443 and genomics View project Frontiers Topic: Methane: A Bioresource for Fuel and Biomolecules  
444 View project. *Crit Rev Biotechnol* 33:49-65.
- 445 Hunsperger HM, Randhawa T, Cattolico RA. 2015. Extensive horizontal gene transfer, duplication,  
446 and loss of chlorophyll synthesis genes in the algae. *BMC Evol Biol* 15:16.
- 447 Jackson C, Knoll AH, Chan CX, Verbruggen H. 2018. Plastid phylogenomics with broad taxon sampling  
448 further elucidates the distinct evolutionary origins and timing of secondary green plastids. *Sci*  
449 *Rep-UK* 8:1-10.
- 450 Johnston IG. 2019. Tension and Resolution: Dynamic, Evolving Populations of Organelle Genomes  
451 within Plant Cells. *Mol Plant* 12:764-783.
- 452 Johnston IG, Williams BP. 2016. Evolutionary Inference across Eukaryotes Identifies Specific  
453 Pressures Favoring Mitochondrial Gene Retention. *Cell Syst* 2:101-111.
- 454 Karnkowska A, Bennett MS, Triemer RE. 2018. Dynamic evolution of inverted repeats in  
455 Euglenophyta plastid genomes OPEN. *Sci Rep-UK* 8:16071[16071-16010].
- 456 Keeling PJ. 2010. The endosymbiotic origin, diversification and fate of plastids. *Philos T R Soc B*  
457 365:729-748.
- 458 Kosakovsky Pond SL, Frost SDW, Muse SV. 2005. HyPhy: hypothesis testing using phylogenies.  
459 *Bioinformatics applications note* 21:676-679.



- 460 Latorre A, Manzano-Marín A. 2017. Dissecting genome reduction and trait loss in insect  
461 endosymbionts. *Ann NY Acad Sci* 1389:52-75.
- 462 Lhee D, Ha J-S, Kim S, Gil Park M, Bhattacharya D, Hwan, Yoon S. 2019. Evolutionary dynamics of the  
463 chromatophore genome in three photosynthetic *Paulinella* species. *Sci Rep-UK* 10:1-11.
- 464 Martín M, Sabater B. 2010. Plastid *ndh* genes in plant evolution. *Plant Physiol Bioch* 48:636-645.
- 465 Martínez-Cano DJ, Reyes-Prieto M, Martínez-Romero E, Partida-Martínez LP, Latorre A, Moya A,  
466 Delaye L, Escalante AE, Antoine O. 2015. Evolution of small prokaryotic genomes. *Front*  
467 *Microbiol* 5:1-23.
- 468 McCutcheon JP, Moran NA. 2012. Extreme genome reduction in symbiotic bacteria. *Nat Rev*  
469 *Microbiol* 10:13-26.
- 470 Millen RS, Olmstead RG, Adams KL, Palmer JD, Lao NT, Heggie L, Kavanagh TA, Hibberd JM, Gray JC,  
471 Morden CW, et al. 2001. Many parallel losses of *infa* from chloroplast dna during angiosperm  
472 evolution with multiple independent transfers to the nucleus. *Plant Cell* 13:645-658.
- 473 Moran NA. 1996. Accelerated evolution and Muller's ratchet in endosymbiotic bacteria. *Proc Natl*  
474 *Acad Sci* 93:2873-2878.
- 475 Moran NA, McCutcheon JP, Nakabachi A. 2008. Genomics and Evolution of Heritable Bacterial  
476 Symbionts. *Annu Rev Genet* 42:165-190.
- 477 Moran NA, Mira A. 2001. The process of genome shrinkage in the obligate symbiont *Buchnera*  
478 *aphidicola*. *Genome Biol* 2:0054.0051-0054.0012.
- 479 Murrell B, Weaver S, Smith MD, Wertheim JO, Murrell S, Aylward A, Eren K, Pollner T, Martin DP,  
480 Smith DM, et al. 2015. Gene-wide identification of episodic selection. *Mol Biol Evol* 32:1365-  
481 1371.
- 482 Novák Vanclová AMG, Zoltner M, Kelly S, Soukal P, Záhonová K, Füssy Z, Ebenezer TGE, Lacová  
483 Dobáková E, Eliáš M, Lukeš J, et al. 2020. Metabolic quirks and the colourful history of the  
484 *Euglena gracilis* secondary plastid. *New Phytologist* 225:1578-1592.
- 485 Nowack ECM, Weber APM. 2018. Genomics-Informed Insights into Endosymbiotic Organelle  
486 Evolution in Photosynthetic Eukaryotes. *Annu Rev Plant Biol* 69:1-34.
- 487 Oakeson KF, Gil R, Clayton AL, Dunn DM, Von Niederhausern AC, Hamil C, Aoyagi A, Duval B, Baca A,  
488 Silva FJ, et al. 2014. Genome degeneration and adaptation in a nascent stage of symbiosis.  
489 *Genome Biol Evol* 6:76-93.
- 490 Ohta T. 1992. The nearly neutral theory of molecular evolution. *Annu. Rev. Ecol. Syst.* 23:263-269.
- 491 Ohta T. 1972. Population Size and Rate of Evolution. *J Mol Evol.*1:305-314.
- 492 Pettersson ME, Berg OG. 2007. Muller's ratchet in symbiont populations. *Genetica* 130:199-211.

- 493 Ponce-Toledo RI, López-García P, Moreira D. 2019. Horizontal and endosymbiotic gene transfer in  
494 early plastid evolution. *New Phytologist*.1-7
- 495 Ponce-Toledo RI, Moreira D, López-García P, Deschamps P. 2018. Secondary plastids of euglenids  
496 and chlorarachniophytes function with a mix of genes of red and green algal ancestry. *Mol Biol*  
497 *Evol.* 35:2198-2204.
- 498 Price DC, Chan X, Yoon S, Yang EC, Qiu H, Weber APM, Schwacke R, Gross J, Blouin NA, Lane C, et al.  
499 2012. Cyanophora paradoxa Genome Elucidates Origin of Photosynthesis in Algae and Plants.  
500 Source: *Science, New Series* 335:843-847.
- 501 Reyes-Prieto A, Yoon HS, Moustafa A, Yang EC, Andersen RA, Boo SM, Nakayama T, Ichiro Ishida K,  
502 Bhattacharya D. 2010. Differential Gene Retention in Plastids of Common Recent Origin. *Mol*  
503 *Biol Evol.* 27:1530-1537.
- 504 Sarai C, Tanifuji G, Nakayama T, Kamikawa R, Takahashi K, Yazaki E, Matsuo E, Miyashita H, Ishida K-i,  
505 Iwataki M, et al. 2020. Dinoflagellates with relic endosymbiont nuclei as models for elucidating  
506 organellogenesis. *Proc Natl Acad Sci USA* 117:5364-5375.
- 507 Sibbald SJ, Archibald JM. 2020. Genomic insights into plastid evolution. *Genome Biol Evol* 12(7):978-  
508 990
- 509 Smith DR. 2015. Mutation Rates in Plastid Genomes: They Are Lower than You Might Think. *Genome*  
510 *Biol Evol* 7:1227-1234.
- 511 Smith DR, Keeling PJ. 2015. Mitochondrial and plastid genome architecture: Reoccurring themes, but  
512 significant differences at the extremes. *Proc Natl Acad Sci USA* 112:10177-10184.
- 513 Suzuki S, Hirakawa Y, Kofuji R, Sugita M, Ken-Ichiro Ishida. 2016. Plastid genome sequences of  
514 *Gymnochlora stellata*, *Lotharella vacuolata*, and *Partenskyella glossopodia* reveal remarkable  
515 structural conservation among chlorarachniophyte species. *J Plant Res* 129:581-590.
- 516 Team RC. 2013. R: A language and environment for statistical computing. R Foundation for Statistical  
517 Computing. Vienna, Austria.
- 518 Valadez-Cano C, Olivares-Hernández R, Resendis-Antonio O, DeLuna A, Delaye L. 2017. Natural  
519 selection drove metabolic specialization of the chromatophore in *Paulinella chromatophora*.  
520 *BMC Evol Biol* 17:1-18.
- 521 Wan XF, Zhou J, Xu D, Wan. 2007. CodonO: a new informatics method for measuring synonymous  
522 codon usage bias within and across genomes. *Int J Gen Syst* 35:109-125.
- 523 Wernegreen JJ. 2015. Endosymbiont evolution: predictions from theory and surprises from  
524 genomes. *Ann NY Acad Sci* 1360:16-35.
- 525 Wernegreen JJ. 2004. Endosymbiosis: Lessons in Conflict Resolution. *PLoS Biology* 2:e68-e68.

- 526 Wernegreen JJ. 2017. In it for the long haul: evolutionary consequences of persistent endosymbiosis.  
527 *Curr Opin Genet Dev* 47:83-90.
- 528 Wertheim JO, Murrell B, Smith MD, Kosakovsky Pond SL, Scheffler K. 2014. RELAX: Detecting Relaxed  
529 Selection in a Phylogenetic Framework. *Mol Biol Evol.* 32:820-832.
- 530 Woolfit M, Bromham L. 2003. Increased rates of sequence evolution in endosymbiotic bacteria and  
531 fungi with small effective population sizes. *Mol Biol Evol* 20:1545-1555.
- 532 Yoon HS, Hackett JD, Ciniglia C, Pinto G, Bhattacharya D. 2004. A Molecular Timeline for the Origin of  
533 Photosynthetic Eukaryotes. *Mol Biol Evol.* 21:809-818.
- 534 Zahonova K, Fussy Z, Bircak E, Novak Vanclova AMG, Klimes V, Vesteg M, Krajcovic J, Obornik M,  
535 Elias M. 2018. Peculiar features of the plastids of the colourless alga *Euglena longa* and  
536 photosynthetic euglenophytes unveiled by transcriptome analyses. *Sci Rep-UK* 8:17012.

537

### 538 **Figure Legends**

539 **Figure 1:** Evolution of green-type plastid across endosymbiosis events. The phylogeny is a  
540 chronogram indicating lineages as having primary plastids (i.e green algae in wheat brown),  
541 branches with secondary plastids(i.e Chlorarachniophytes, Lepidodinium, Euglenophytes in  
542 pink) and branches along which endosymbiosis happens (orange). Inferred gene losses are  
543 indicated along the branches.

544 **Figure 2:** Inferred rates of gene loss in branches with primary plastids (P), secondary plastids  
545 (S) and branches along which endosymbiosis (E) takes place.

546 **Figure 3:** Distribution of the relative selection intensity parameter( $k$ ) values of the Hyphy  
547 RELAX model for (i) Endosymbiosis (test) Vs Primary and Secondary branches (reference) [ $E$   
548  $\times$  P+S model], (ii) Secondary(test) Vs Primary (reference), excluding endosymbiosis branches  
549 [ $S \times P(E)$  model]. Selection intensity is relaxed when  $k < 1$  or intensified when  $k > 1$ . These plots  
550 show that endosymbiosis branches have relaxed selection compared to the primary and  
551 secondary branches and that selection on secondary branches is similar to that of primary  
552 branches, indicating that the relation of selection during endosymbiosis is temporary.

553 **Figure 4:** A general model for molecular dynamics during secondary green-type plastid  
554 endosymbiosis. The model illustrates the population bottleneck due to involvement of very  
555 small fraction of the actual population of the engulfed primary alga in secondary

556 endosymbiosis. As the endosymbiont-host relation ages the effective population size  
557 increases that counteracts the impact of stochastic drift leading establishment of secondary  
558 plastids after endosymbiosis.

559 **Table 1:** The number of green algal plastid genes showing numbers of genes showing  
560 relaxation and intensification for each model.

| <b>Model</b>    | <b>Relaxation<br/>(k&lt;1)</b> | <b>Significant<br/>Relaxation</b> | <b>Intensification<br/>(k&gt;1)</b> | <b>Significant<br/>Intensification</b> | <b>Neither<br/>k=1)</b> |
|-----------------|--------------------------------|-----------------------------------|-------------------------------------|----------------------------------------|-------------------------|
| <b>E × P+S</b>  | 32                             | 26                                | 2                                   | -                                      | -                       |
| <b>S × P(E)</b> | 19                             | 13                                | 12                                  | 9                                      | 3                       |

561 **Supplementary Materials** - <https://doi.org/10.26188/14616999>

562

563

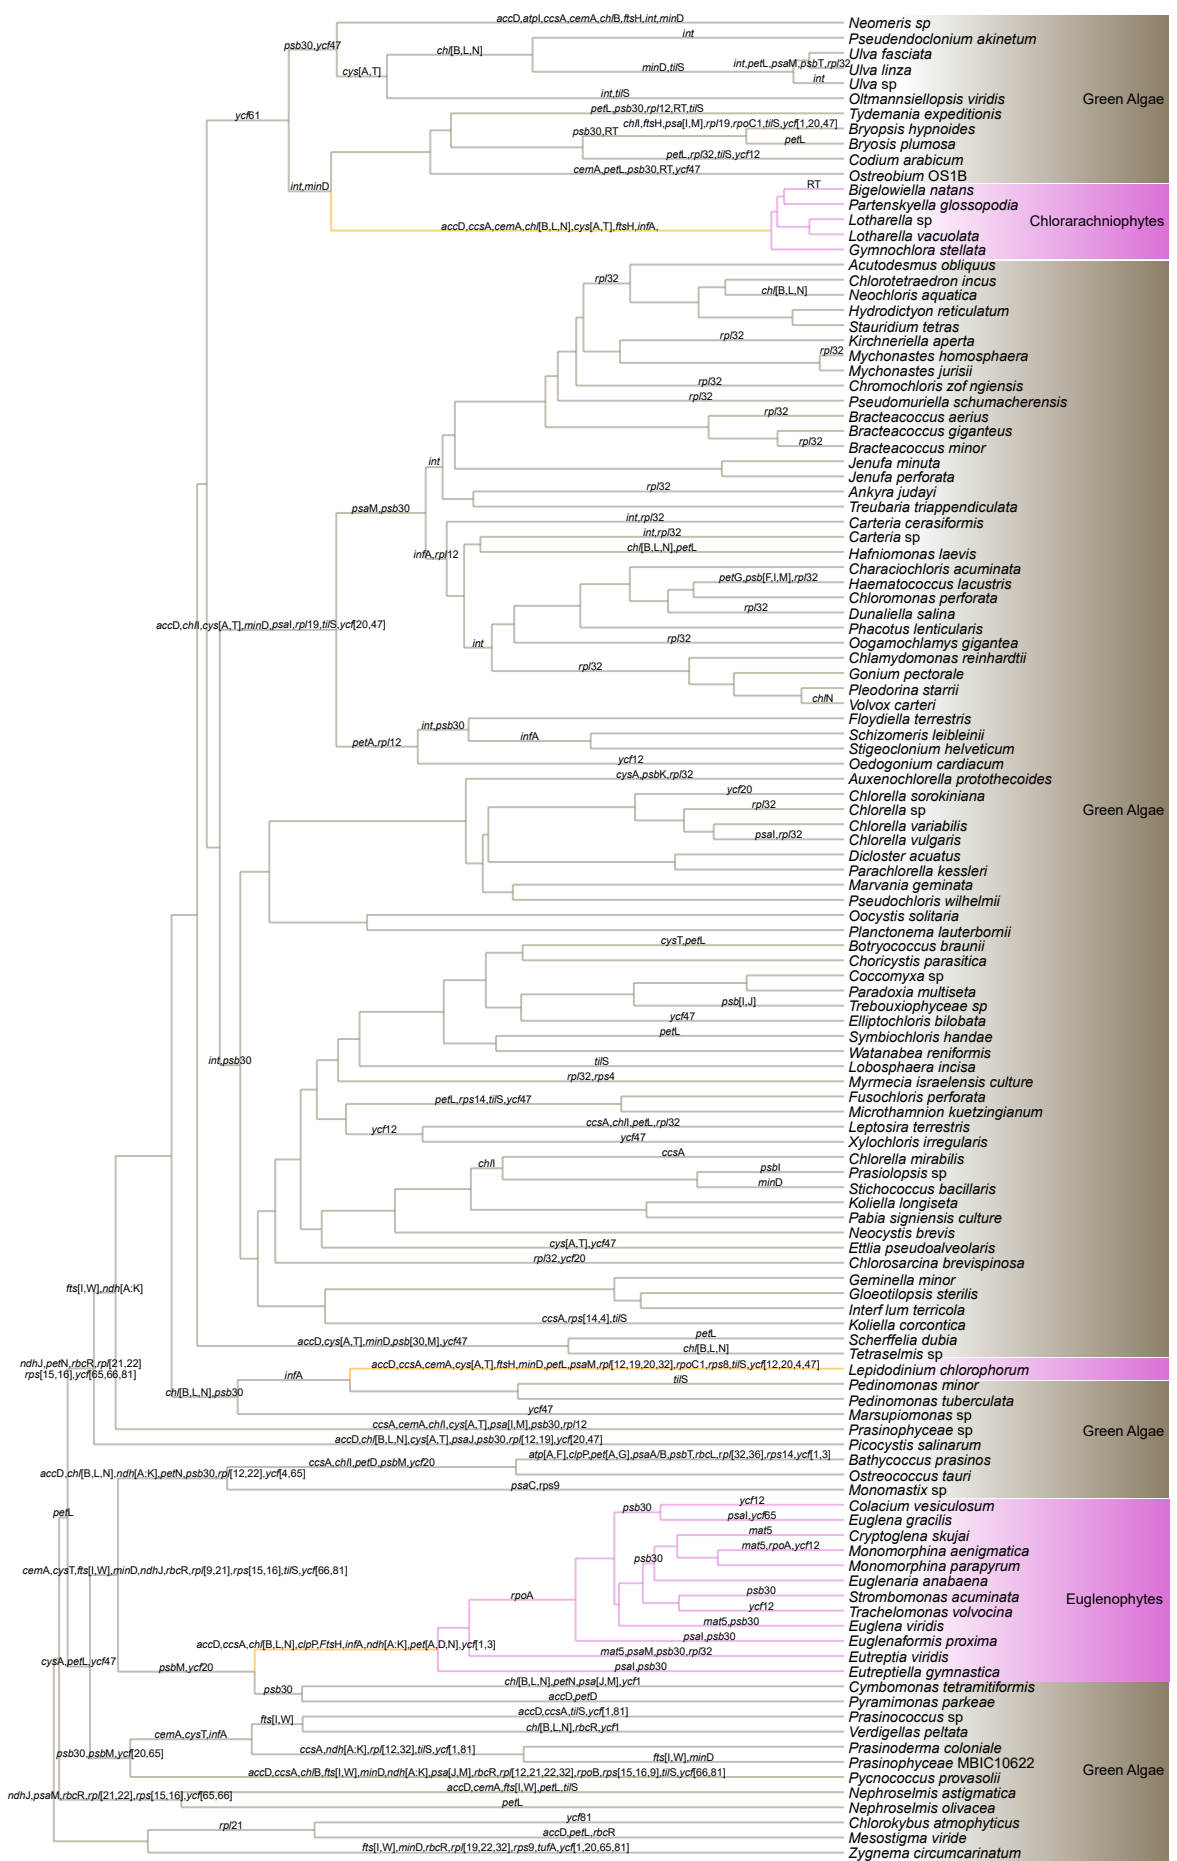

**Figure 1.** Evolution of green-type plastids across endosymbiosis events. The phylogeny is a chronogram indicating lineages as having primary plastids (i.e. green algae, in wheat brown), branches with secondary plastids (i.e. Chlorarachniophytes, *Lepidodinium*, Euglenophytes, in pink) and branches along which endosymbiosis happens (orange). Inferred gene losses are indicated along the branches.

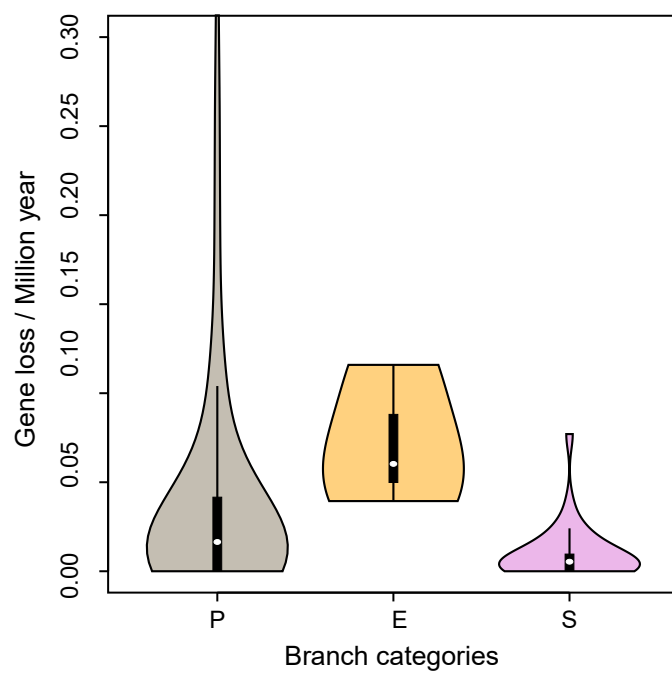

**Figure 2.** Inferred rates of gene loss in branches with primaryplastids(P),secondaryplastids(S) and branches along which endosymbiosis (E) takes place.

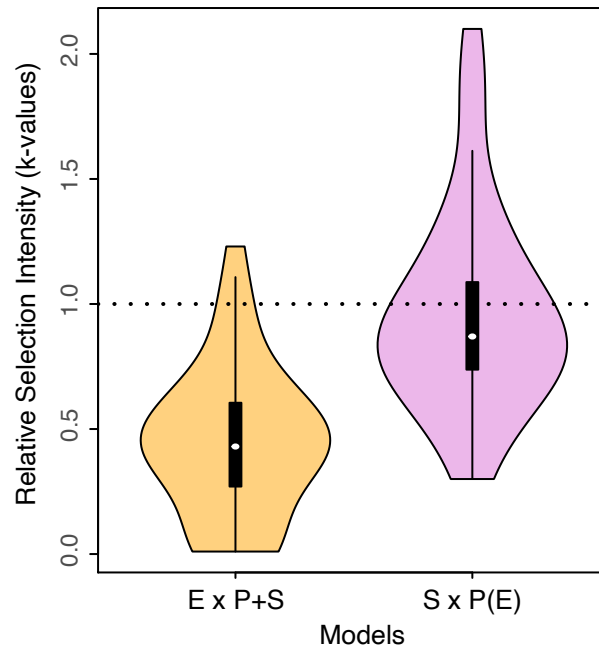

**Figure 3.** Distribution of the relative selection intensity parameter ( $k$ ) of the HyPhy RELAX model for (i) Endosymbiosis (test) vs. Primary and Secondary branches (reference) [ $E \times P+S$  model],(ii) Secondary (test) vs. Primary branches (reference), excluding endosymbiosis branches [ $S \times P(E)$  model]. Selection intensity is relaxed in the test branches when  $k < 1$  or intensified when  $k > 1$ . These plots show that endosymbiosis branches have relaxed selection compared to primary and secondary branches, and that selection on secondary branches is similar to that of primary branches, indicating that the relaxation of selection during endosymbiosis is temporary.



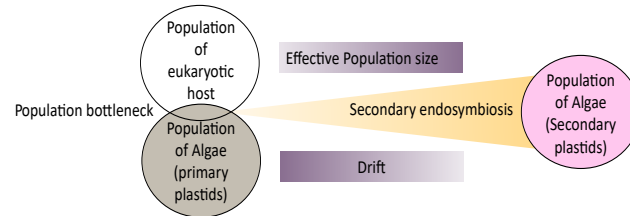

Figure 4: A general model for molecular dynamics during secondary green-type plastid endosymbiosis. The model illustrates the population bottleneck due to involvement of very small fraction of the actual population of the engulfed primary alga in secondary endosymbiosis. As the endosymbiont-host relation ages the effective population size increases that counteracts the impact of stochastic drift leading establishment of secondary plastids after endosymbiosis.
